# Supplementary material
Source: PubMed Central journal article supplement (PMC3605742)
Supplement: NIHMS422331-supplement-01.pdf [file NIHMS422331-supplement-01.pdf]

**Table S1.** Spectral secondary structure composition of BSA in pH 2, 7.4 and 9 solutions, as obtained by CDPRO fitting (CDSSTR, SP43/SDP48).<sup>a</sup>

|                 | $\alpha$ (%)  | Distorted $\alpha$ (%) | $\beta$ (%)    | turn (%)       | random (%)     |
|-----------------|---------------|------------------------|----------------|----------------|----------------|
| pH 7.4 (native) |               |                        |                |                |                |
|                 | $55 \pm 0.76$ | $24 \pm 0.53$          | $10 \pm 0.37$  | $8.0 \pm 0.72$ | $3.0 \pm 0.81$ |
| pH 2            |               |                        |                |                |                |
| Initial Reading | $37 \pm 0.75$ | $26 \pm 0.72$          | $15 \pm 0.36$  | $13 \pm 0.68$  | $10 \pm 0.78$  |
| Day 1           | $30 \pm 0.52$ | $24 \pm 0.58$          | $17 \pm 0.29$  | $13 \pm 0.57$  | $17 \pm 0.80$  |
| Day 2           | $31 \pm 0.58$ | $23 \pm 0.50$          | $20 \pm 0.25$  | $14 \pm 0.77$  | $13 \pm 0.86$  |
| Day 3           | $31 \pm 0.53$ | $25 \pm 0.65$          | $16 \pm 0.29$  | $15 \pm 0.86$  | $14 \pm 0.82$  |
| Day 4           | $44 \pm 0.91$ | $28 \pm 0.58$          | $14 \pm 0.33$  | $8.0 \pm 0.63$ | $7.0 \pm 0.82$ |
| Day 5           | $29 \pm 0.83$ | $23 \pm 0.40$          | $19 \pm 0.12$  | $14 \pm 0.72$  | $15 \pm 0.94$  |
| Day 6           | $34 \pm 0.74$ | $26 \pm 0.47$          | $16 \pm 0.20$  | $13 \pm 0.82$  | $11 \pm 0.78$  |
| pH 9            |               |                        |                |                |                |
| Initial Reading | $50 \pm 0.80$ | $25 \pm 0.84$          | $12 \pm 0.66$  | $7.6 \pm 0.51$ | $5.8 \pm 0.44$ |
| Week 1          | $55 \pm 0.79$ | $25 \pm 0.44$          | $8.6 \pm 0.59$ | $4.7 \pm 0.51$ | $6.2 \pm 0.74$ |
| Week 2          | $48 \pm 0.95$ | $25 \pm 0.65$          | $13 \pm 0.91$  | $7.6 \pm 0.68$ | $6.5 \pm 0.47$ |
| Week 3          | $46 \pm 1.10$ | $25 \pm 0.62$          | $13 \pm 0.88$  | $8.6 \pm 0.78$ | $7.1 \pm 0.50$ |
| Week 4          | $52 \pm 1.00$ | $24 \pm 0.71$          | $10 \pm 0.59$  | $7.1 \pm 0.47$ | $6.7 \pm 0.67$ |
| Week 5          | $49 \pm 0.79$ | $24 \pm 0.56$          | $13 \pm 0.65$  | $7.1 \pm 0.65$ | $6.0 \pm 0.63$ |
| Week 6          | $48 \pm 1.16$ | $25 \pm 0.46$          | $13 \pm 0.66$  | $8.1 \pm 0.93$ | $6.9 \pm 0.44$ |
| Week 7          | $48 \pm 0.76$ | $24 \pm 0.78$          | $12 \pm 0.59$  | $7.7 \pm 0.67$ | $7.5 \pm 0.47$ |
| Week 8          | $50 \pm 0.99$ | $25 \pm 0.32$          | $10 \pm 0.66$  | $6.9 \pm 0.62$ | $7.5 \pm 0.75$ |

<sup>a</sup>  $\beta$  content has been taken as the combination of  $\beta$ -sheet + distorted  $\beta$ -sheet.

**Table S2.**  $\frac{[\theta]_{222}}{[\theta]_{208}}$  ratios of bovine serum albumin CD MRE spectra.

|                 | pH 2       |                 | pH 9       |
|-----------------|------------|-----------------|------------|
| Initial reading | 1.07± 0.01 | Initial reading | 1.01± 0.01 |
| Day 1           | 1.01± 0.01 | Week 1          | 0.99± 0.01 |
| Day 2           | 1.06± 0.01 | Week 2          | 0.97± 0.01 |
| Day 3           | 0.95± 0.02 | Week 3          | 0.98± 0.01 |
| Day 4           | 0.87± 0.01 | Week 4          | 0.93± 0.01 |
| Day 5           | 0.84± 0.02 | Week 5          | 0.93± 0.01 |
| Day 6           | 0.98± 0.01 | Week 6          | 0.99± 0.01 |
|                 |            | Week 7          | 1.08± 0.01 |
|                 |            | Week 8          | 1.04± 0.01 |

Figure S1A

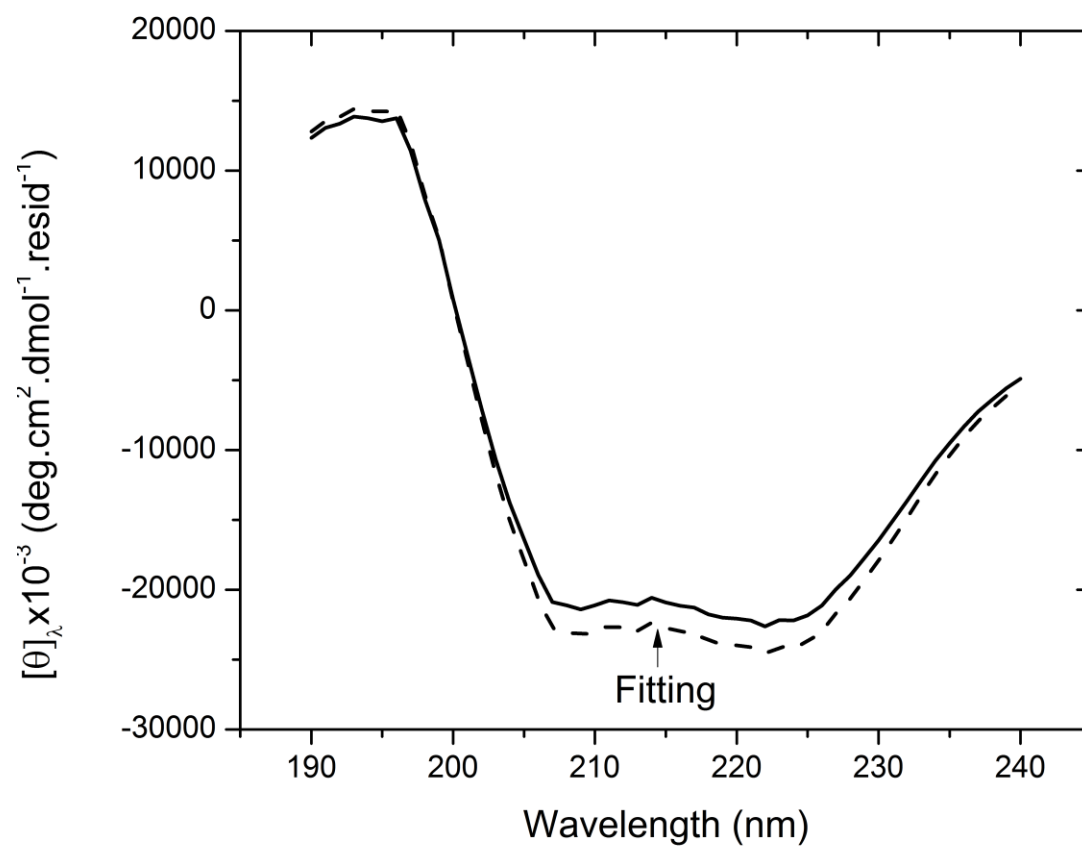

**Figure S1B**

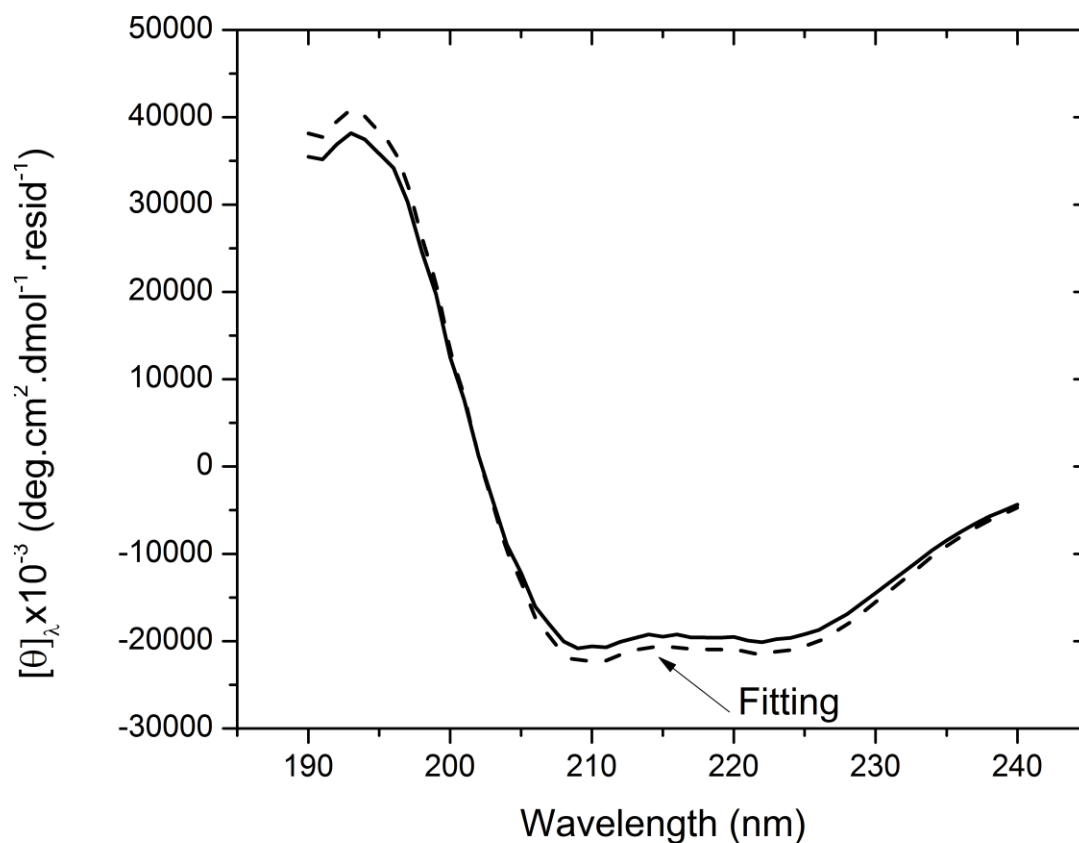

**Figure S1.** Representative fitting results using the CDPro CDSSTR SP43 fitting algorithm to the initial circular dichroic spectra of A) pH 2 and B) pH 9 bovine serum albumin. In both cases, the solid line represents the raw data of the initial spectra, while the dashed line represents the fitted spectral results using the aforementioned algorithm.
